# Supplementary material for: The Higher the CKD Stage, the Higher the Psychological Stress in Patients with CKD during COVID-19 Pandemic
Source: MDPI journal article supplement (doi:10.3390/jcm11164776), 2022-08-16
Supplement: s1 [file s1]

**Supplementary Table S1.** Comparison of score and severity of questionnaires covering mental health status between non-dialytic CKD and dialysis CKD patients

|                         | <b>Non-dialytic CKD<br/>(<i>n</i> = 249)</b> | <b>Dialysis<br/>(<i>n</i> = 148)</b> | <b><i>p</i> - value</b> |
|-------------------------|----------------------------------------------|--------------------------------------|-------------------------|
| <b>PHQ-9</b>            | 4.67±5.06                                    | 5.57±6.36                            | 0.121                   |
| Severity                |                                              |                                      | 0.084                   |
| Normal (0-8 points)     | 146 (59.8%)                                  | 85 (57.4%)                           |                         |
| Mild (9-14 points)      | 64 (25.7%)                                   | 28 (18.9%)                           |                         |
| Moderate (15-19 points) | 20 (8.0%)                                    | 16 (10.8%)                           |                         |
| Severe (20-27 points)   | 16 (6.4%)                                    | 19 (12.8%)                           |                         |
| <b>GAD-7</b>            | 9.67±4.42                                    | 10.51±5.19                           | 0.086                   |
| Severity                |                                              |                                      | 0.096                   |
| Normal (0-4 points)     | 0 (0%)                                       | 1 (0.7%)                             |                         |
| Mild (5-9 points)       | 171 (68.7%)                                  | 90 (60.8%)                           |                         |
| Moderate (10-14 points) | 52 (20.9%)                                   | 33 (22.3%)                           |                         |
| Severe (15-21 points)   | 26 (10.4%)                                   | 24 (16.2%)                           |                         |
| <b>IES-R</b>            | 15.16±13.24                                  | 15.07±14.01                          | 0.949                   |
| Severity                |                                              |                                      | 0.479                   |
| Normal (0-8 points)     | 102 (41.0%)                                  | 62 (41.9%)                           |                         |
| Mild (9-25 points)      | 102 (41.0%)                                  | 50 (33.8%)                           |                         |
| Moderate (26-43 points) | 34 (13.7%)                                   | 28 (18.9%)                           |                         |
| Severe (44-88 points)   | 11 (4.4%)                                    | 8 (5.4%)                             |                         |
| <b>ISI</b>              | 6.39±5.11                                    | 7.88±5.74                            | 0.008                   |
| Severity                |                                              |                                      | <0.001                  |
| Normal (0-7 points)     | 158 (63.7%)                                  | 76 (51.4%)                           |                         |
| Mild (8-14 points)      | 89 (35.9%)                                   | 52 (35.1%)                           |                         |
| Moderate (15-21 points) | 1 (0.4%)                                     | 18 (12.2%)                           |                         |
| Severe (22-28 points)   | 0 (0%)                                       | 2 (1.4%)                             |                         |

CKD, chronic kidney disease; PHQ-9, the 9-item Patient Health Questionnaire; GAD-7, the 7-item Generalized Anxiety Disorder scale; IES-R, the 22-item impact of Event Scale-Revised; ISI, insomnia severity index.



**Supplementary Table S2.** Comparison of concerns and precautionary measures for 2019 coronavirus disease (COVID-19) between non-dialytic CKD and dialysis CKD patients

| N (%) or mean $\pm$ SD                                                         | Non-dialysis CKD<br>(n = 249) | Dialysis<br>(n = 148) | p - value |
|--------------------------------------------------------------------------------|-------------------------------|-----------------------|-----------|
| Likelihood of contracting COVID-19 during the current outbreak                 |                               |                       |           |
| Very likely                                                                    | 4 (1.6)                       | 1 (0.7)               | 0.042     |
| Somewhat likely                                                                | 4 (1.6)                       | 4 (2.7)               |           |
| Not very likely                                                                | 73 (29.3)                     | 63 (42.6)             |           |
| Not likely at all                                                              | 168 (67.5)                    | 80 (54.1)             |           |
| Level of confidence in patient's own doctor's ability to diagnose or recognize |                               |                       |           |
| Very confident                                                                 | 108 (43.4)                    | 50 (33.8)             | 0.833     |
| Somewhat confident                                                             | 116 (46.6)                    | 91 (61.5)             |           |
| Not very confident                                                             | 10 (4.0)                      | 2 (1.4)               |           |
| Not at all confident                                                           | 15 (6.0)                      | 5 (3.4)               |           |
| Likelihood of surviving if infected with COVID-19                              |                               |                       |           |
| Very likely                                                                    | 36 (14.5)                     | 22 (14.9)             | 0.956     |
| Somewhat likely                                                                | 101 (40.7)                    | 58 (39.2)             |           |
| Not very likely                                                                | 90 (36.3)                     | 56 (37.8)             |           |
| Not likely at all                                                              | 21 (8.5)                      | 12 (8.1)              |           |
| Concerns about other family members getting COVID-19 infections                |                               |                       |           |
| Very likely                                                                    | 81 (32.7)                     | 49 (33.1)             | 0.762     |
| Somewhat likely                                                                | 132 (53.2)                    | 80 (54.1)             |           |
| Not very likely                                                                | 24 (9.7)                      | 14 (9.5)              |           |
| Not likely at all                                                              | 11 (4.4)                      | 5 (3.4)               |           |
| Covering mouth when coughing and sneezing                                      |                               |                       |           |
| Very likely                                                                    | 105 (42.2)                    | 55 (37.2)             | 0.198     |
| Somewhat likely                                                                | 133 (53.4)                    | 81 (54.7)             |           |
| Not very likely                                                                | 7 (2.8)                       | 10 (6.8)              |           |
| Not likely at all                                                              | 4 (1.6)                       | 2 (1.4)               |           |
| Avoiding sharing utensils (e.g., chopsticks) during meals                      |                               |                       |           |
| Very likely                                                                    | 58 (23.3)                     | 29 (19.6)             | 0.539     |
| Somewhat likely                                                                | 125 (50.2)                    | 77 (52.0)             |           |
| Not very likely                                                                | 53 (21.3)                     | 35 (23.6)             |           |
| Not likely at all                                                              | 13 (5.2)                      | 7 (4.7)               |           |
| Washing hands immediately after coughing, rubbing the nose, or sneezing        |                               |                       |           |
| Very likely                                                                    | 47 (18.9)                     | 30 (20.3)             | 0.943     |



|                                                                         |              |              |         |
|-------------------------------------------------------------------------|--------------|--------------|---------|
| Somewhat likely                                                         | 124 (49.8)   | 71 (48.0)    |         |
| Not very likely                                                         | 74 (29.7)    | 44 (29.7)    |         |
| Not likely at all                                                       | 4 (1.6)      | 3 (2.0)      |         |
| Wearing mask regardless of the presence or absence of symptoms          |              |              |         |
| Very likely                                                             | 127 (51.2)   | 81 (54.7)    | 0.185   |
| Somewhat likely                                                         | 105 (42.3)   | 61 (41.2)    |         |
| Not very likely                                                         | 10 (4.0)     | 5 (3.4)      |         |
| Not likely at all                                                       | 6 (2.4)      | 0 (0)        |         |
| Feeling that too much unnecessary worry surrounds the COVID-19 outbreak |              |              |         |
| Very likely                                                             | 32 (12.4)    | 22 (14.9)    | 0.152   |
| Somewhat likely                                                         | 94 (37.8)    | 62 (41.9)    |         |
| Not very likely                                                         | 107 (43.0)   | 58 (39.2)    |         |
| Not likely at all                                                       | 17 (6.8)     | 6 (4.1)      |         |
| Average number of hours stayed at home per day to avoid COVID-19        |              |              |         |
| Hours                                                                   | 13.65 ± 6.17 | 15.92 ± 6.23 | < 0.001 |

CKD, chronic kidney disease.



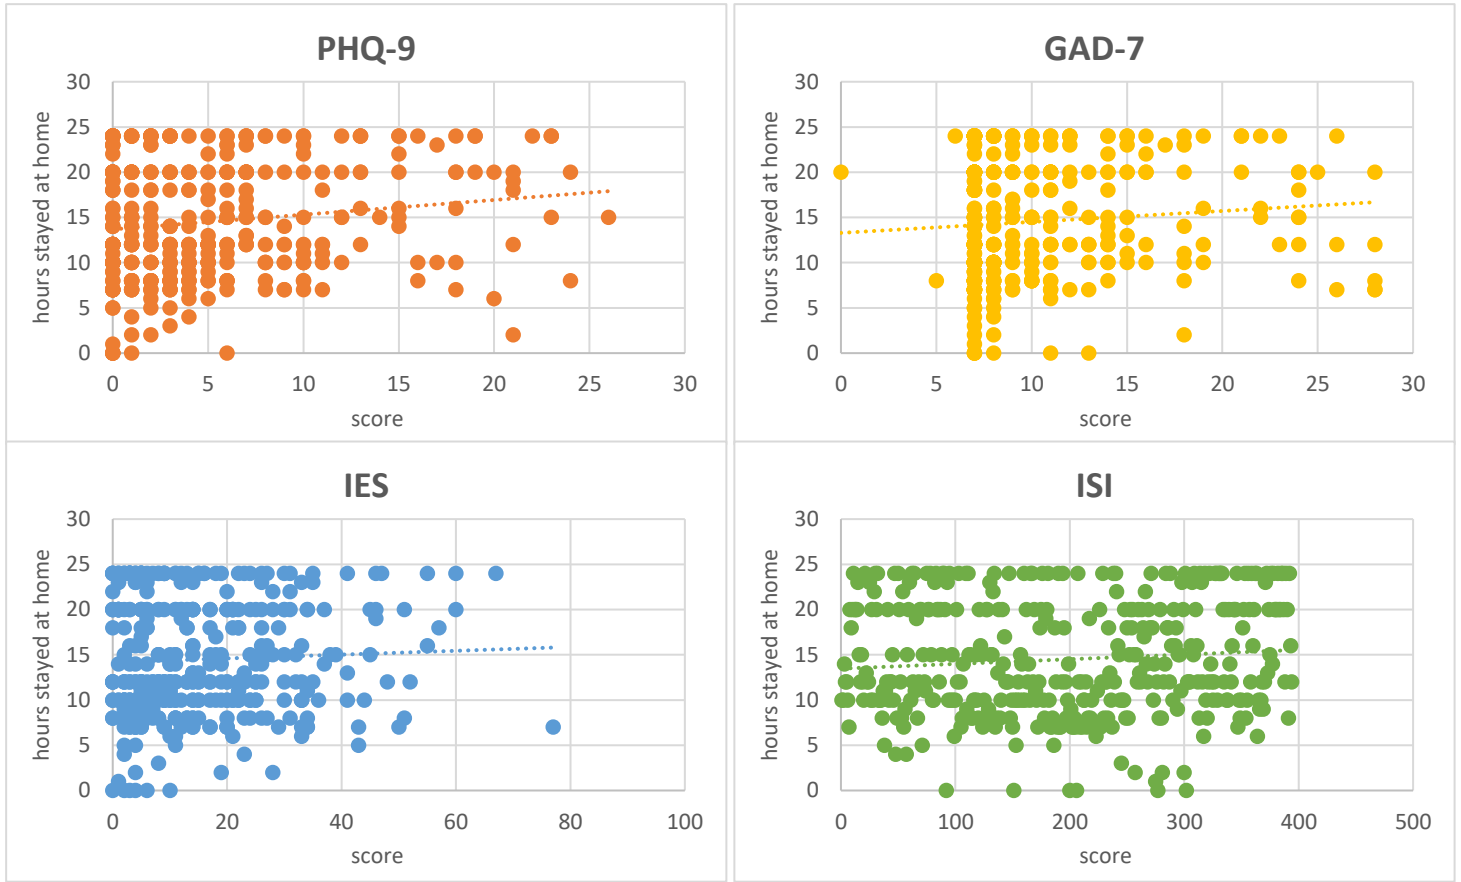

|                           | PHQ-9    | GAD-7    | IES      | ISI      |
|---------------------------|----------|----------|----------|----------|
| Correlation coefficient   | 0.144665 | 0.090973 | 0.045209 | 0.073286 |
| Coefficient determination | 0.020928 | 0.008276 | 0.002044 | 0.005371 |
| <i>p</i> -value           | 0.004008 | 0.071267 | 0.370797 | 0.146496 |

**Supplementary Figure S1.** Hours stayed at home to avoid COVID-19 and PHQ-9, GAD-7, IES, and ISI scores of patients were compared through correlation analysis. All showed positive correlations, although their correlation coefficients were not large. Only the correlation between PHQ-9 suggesting depression and time stayed at home showed a statistical significance. PHQ-9, the 9-item Patient Health Questionnaire; GAD-7, the 7-item Generalized Anxiety Disorder scale; IES-R, the 22-item impact of Event Scale-Revised; ISI, insomnia severity index.
